# Supplementary material
Source: PubMed Central journal article supplement (PMC6703183)
Supplement: sb9b00142_si_001.pdf [file sb9b00142_si_001.pdf]

# Supporting Information

## Automated design of diverse stand-alone riboswitches

Michelle J Wu<sup>1</sup>, Johan O L Andreasson<sup>2,3</sup>, Wipapat Kladwang<sup>3</sup>, William Greenleaf<sup>2,4</sup>, Rhiju Das<sup>3,4,\*</sup>

1 Program in Biomedical Informatics, Stanford University, Stanford, CA, USA

2 Department of Genetics, Stanford University, Stanford, CA, USA

3 Department of Biochemistry, Stanford University, Stanford, CA, USA

4 Department of Applied Physics, Stanford University, Stanford, CA, USA

5 Department of Physics, Stanford University, Stanford, CA, USA

\* Corresponding author: [rhiju@stanford.edu](mailto:rhiju@stanford.edu)

## Figure S1

**Predicted activation ratios for Kellenberger et al riboswitches.** Using our thermodynamic framework, we predicted activation ratios for the cyclic di-AMP biosensors described by Kellenberger et al.

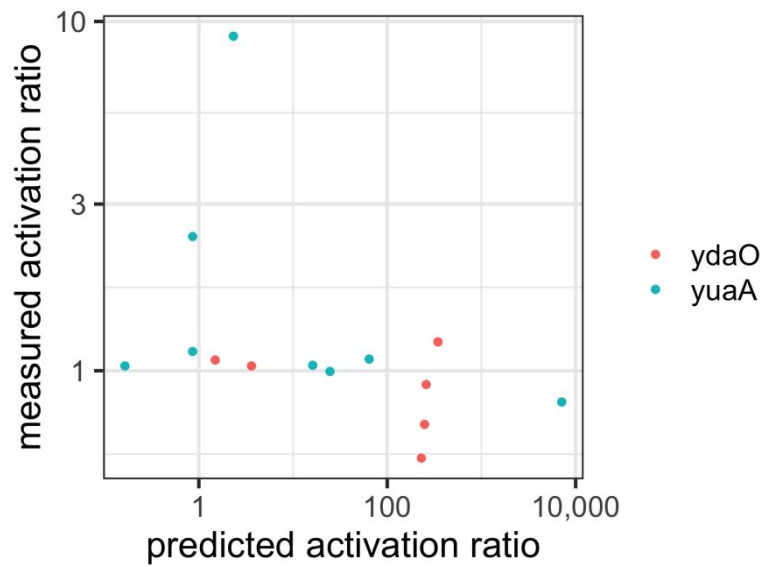

## Figure S2

**Reproducibility of experimental measurements.**  $K_d$  (A) and activation ratio (B) values measured over two replicates correlate with an  $r^2$  (in log space) of 0.94 and 0.84, respectively. The color represents the minimum number of clusters across the two replicates. The dotted lines denote the boundary for error within a factor of 2 between the two measurements.

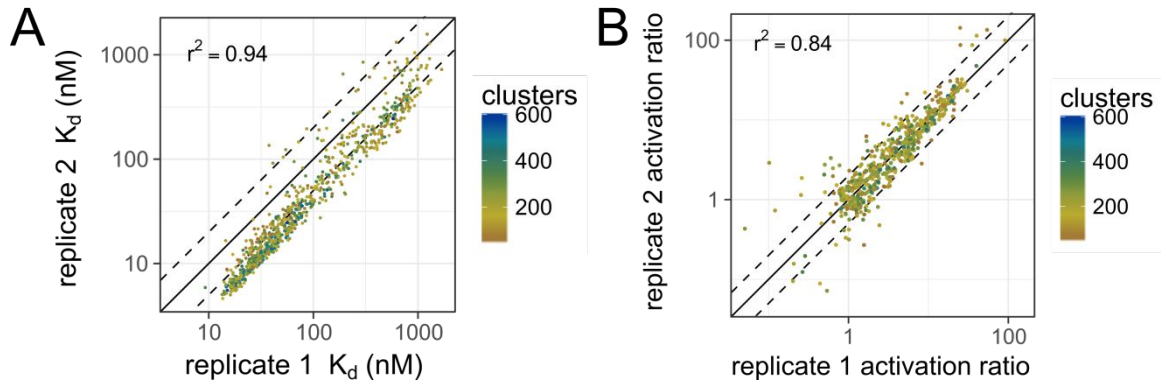

### Figure S3

On and off state  $K_d$ 's for RiboLogic small molecule riboswitches.  $K_d^{ON}$  vs.  $K_d^{OFF}$  plots show that most designs achieve  $K_d^{ON}$  within a factor of 10 of the intrinsic  $K_d$  of the MS2 protein under conditions where they should be activated (dotted lines).

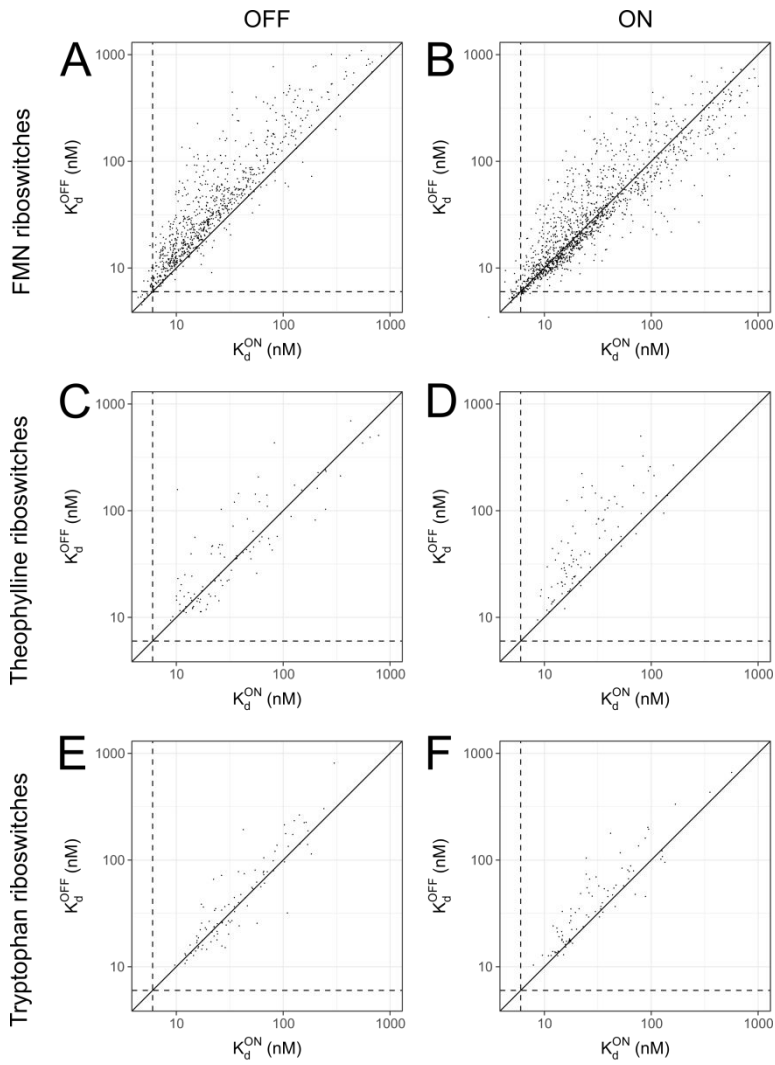

## Figure S4

**Intrinsic  $K_d$  values for aptamers.** Chemical mapping was used to determine intrinsic  $K_d$  for the FMN, theophylline, and tryptophan aptamers used in the riboswitch designs.

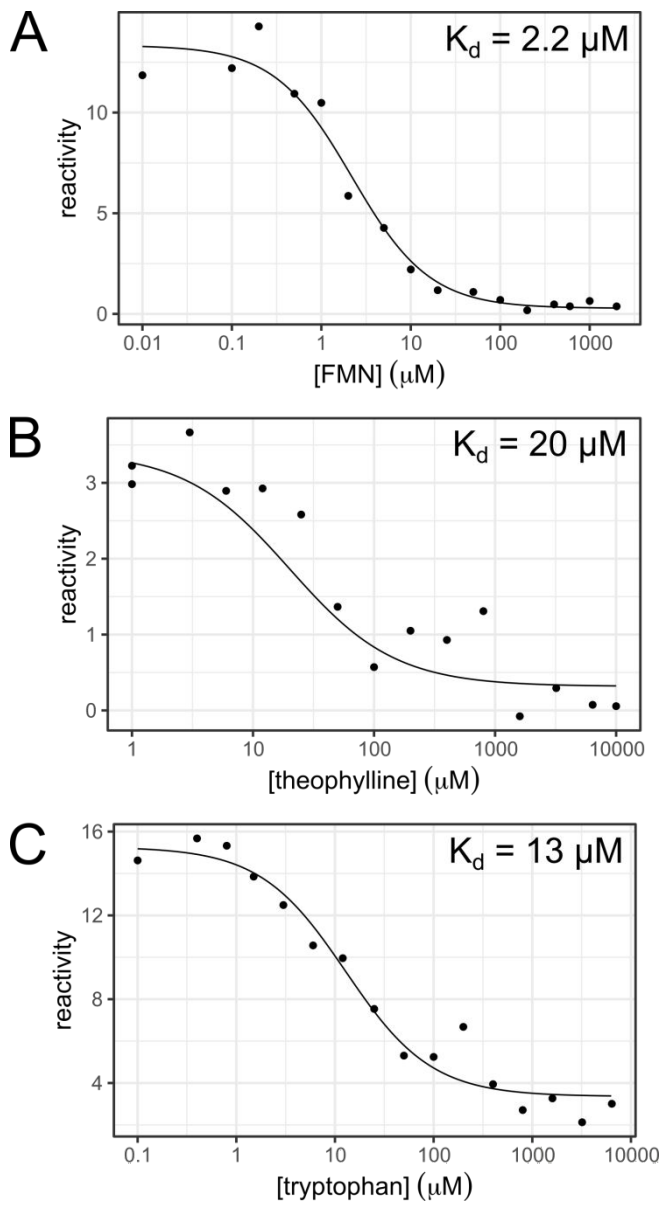

## Figure S5

**Activation ratios relative to thermodynamic maximum.** Using the intrinsic  $K_d$ 's for the FMN, theophylline, and tryptophan aptamers, we computed the optimal activation ratio as  $\frac{[L]}{K_d} + 1$ . The activation ratios achieved by RiboLogic are plotted relative to these maxima (solid black line).

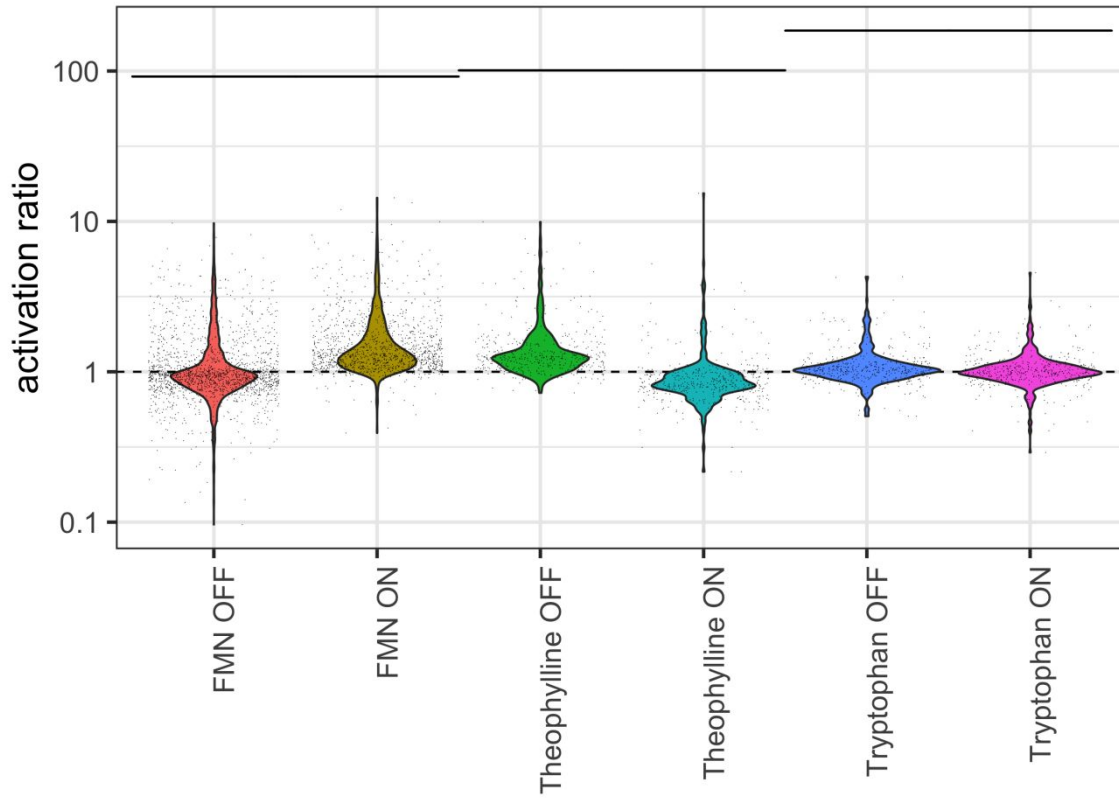

## Figure S6

**Number of iterations to convergence.** The number of iterations of Monte Carlo to reach constraint satisfaction varied across different ligands. On average, every 1,000 iterations took about 2 minutes on one core.

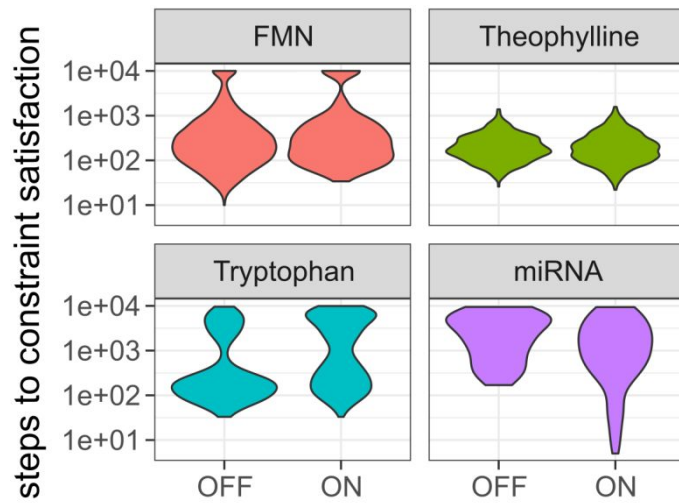

## Figure S7

**Secondary structure features and activation ratio.** The data show that some secondary structure features correlate significantly (Fisher z-transform) with activation ratio. These include the number of bulges and number of hairpin/internal/multi loops in the absence of ligand as well as the number of internal loops in the presence of ligand. Further, more shared base pairs between states was correlated with higher activation ratios.

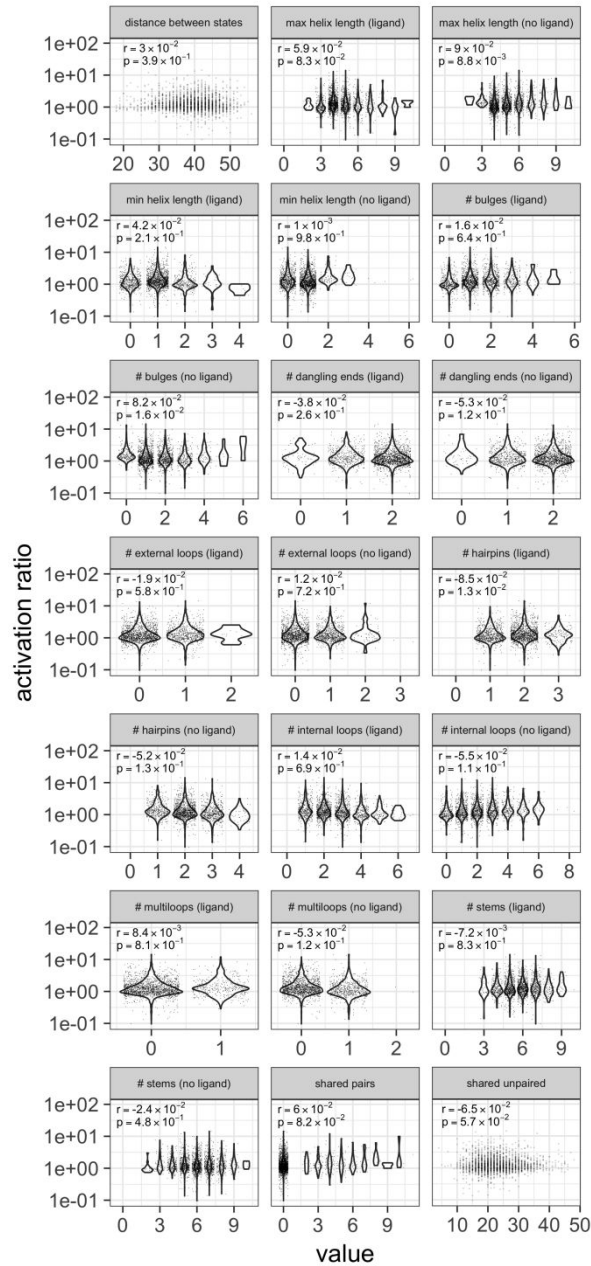



## Figure S8

**Comparison of predicted and measured  $K_d$  values.** For both small molecule (A) and miRNA (B) riboswitches, there is a significant correlation between predicted and measured  $K_d$  values, but the degree of correlation is poor.

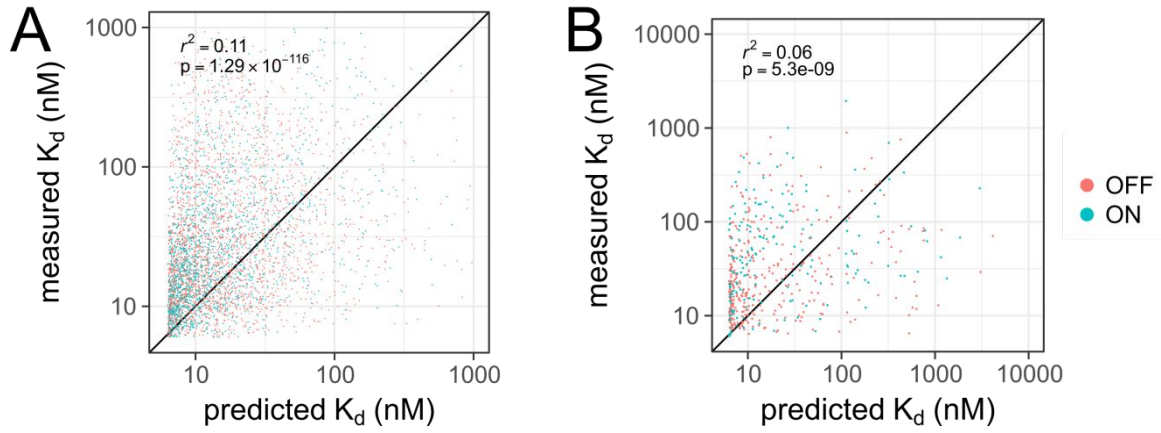

## Table S1

Summary statistics for activation ratios for RiboLogic and baseline.

| Design           | RiboLogic |        |                    |       | baseline |        |                    |       |
|------------------|-----------|--------|--------------------|-------|----------|--------|--------------------|-------|
|                  | max       | median | standard deviation | count | max      | median | standard deviation | count |
| FMN OFF          | 9.74      | 0.987  | 0.878              | 1357  | 1.15     | 0.869  | 0.144              | 524   |
| FMN ON           | 14.4      | 1.46   | 1.33               | 849   | 2.90     | 1.15   | 0.308              | 524   |
| theophylline OFF | 9.92      | 1.73   | 1.60               | 97    | 4.62     | 1.22   | 0.369              | 366   |
| theophylline ON  | 15.4      | 0.991  | 1.65               | 99    | 1.33     | 0.820  | 0.155              | 366   |
| tryptophan OFF   | 4.29      | 1.17   | 0.632              | 89    | 2.47     | 1.01   | 0.206              | 392   |
| tryptophan ON    | 4.55      | 1.08   | 0.576              | 94    | 1.97     | 0.988  | 0.181              | 392   |
| miRNA OFF        | 21.8      | 0.825  | 1.68               | 188   | 4.95     | 0.819  | 0.483              | 188   |
| miRNA ON         | 20.0      | 1.17   | 2.20               | 98    | 4.26     | 1.23   | 0.584              | 98    |

## Table S2

**Summary of statistical tests comparing RiboLogic activation ratios.** All comparisons used a two-sided Wilcoxon rank sum test.

| design           | RiboLogic vs baseline | RiboLogic vs non-switching (activation ratio 1) |
|------------------|-----------------------|-------------------------------------------------|
| FMN OFF          | $8.0 \times 10^{-41}$ | $1.1 \times 10^{-6}$                            |
| FMN ON           | $8.5 \times 10^{-58}$ | $2.8 \times 10^{-130}$                          |
| Theophylline OFF | $3.5 \times 10^{-13}$ | $3.0 \times 10^{-16}$                           |
| Theophylline ON  | $2.0 \times 10^{-10}$ | 0.071                                           |
| Tryptophan OFF   | $3.4 \times 10^{-13}$ | $1.8 \times 10^{-10}$                           |
| Tryptophan ON    | $6.0 \times 10^{-14}$ | $1.5 \times 10^{-3}$                            |
| miRNA OFF        | 0.98                  | $7.4 \times 10^{-7}$                            |
| miRNA ON         | 0.15                  | $1.7 \times 10^{-4}$                            |

## Table S3

Comparisons to baseline distribution.

| design           | total number of designs | total number above baseline median | percentage above baseline median | total number above baseline 95 <sup>th</sup> percentile | percentage above baseline 95 <sup>th</sup> percentile |
|------------------|-------------------------|------------------------------------|----------------------------------|---------------------------------------------------------|-------------------------------------------------------|
| FMN OFF          | 1357                    | 944                                | 70%                              | 627                                                     | 46%                                                   |
| FMN ON           | 849                     | 703                                | 83%                              | 252                                                     | 30%                                                   |
| Theophylline OFF | 97                      | 72                                 | 74%                              | 46                                                      | 47%                                                   |
| Theophylline ON  | 99                      | 74                                 | 75%                              | 42                                                      | 42%                                                   |
| Tryptophan OFF   | 89                      | 72                                 | 81%                              | 36                                                      | 40%                                                   |
| Tryptophan ON    | 94                      | 58                                 | 62%                              | 27                                                      | 29%                                                   |
| miRNA OFF        | 188                     | 93                                 | 49%                              | 13                                                      | 7%                                                    |
| miRNA ON         | 98                      | 45                                 | 46%                              | 10                                                      | 10%                                                   |

## Table S4

**Summary of best-of-ten analysis.** All values are based on 1,000 bootstrap samples of 10 designs each. Comparisons were made using a two-sided Wilcoxon rank sum test.

| design           | RiboLogic median | Baseline median | p-value                |
|------------------|------------------|-----------------|------------------------|
| FMN OFF          | 2.57             | 1.01            | $< 2 \times 10^{-308}$ |
| FMN ON           | 3.89             | 1.69            | $1.8 \times 10^{-252}$ |
| Theophylline OFF | 4.86             | 1.72            | $3.3 \times 10^{-281}$ |
| Theophylline ON  | 3.44             | 1.04            | $< 2 \times 10^{-308}$ |
| Tryptophan OFF   | 2.28             | 1.24            | $2.4 \times 10^{-264}$ |
| Tryptophan ON    | 2.08             | 1.23            | $3.7 \times 10^{-237}$ |
| miRNA OFF        | 1.66             | 1.52            | $8.5 \times 10^{-6}$   |
| miRNA ON         | 2.84             | 2.10            | $7.2 \times 10^{-26}$  |

## Supplemental Data

**RiboLogic-solves\_190327.txt** (tab-delimited text file) contains all sequences used in this study, along with predicted secondary structures and predicted and observed dissociation constants for the output MCP protein.
